# Supplementary material for: Engagement of TRAIL triggers degranulation and IFNγ production in human natural killer cells
Source: PubMed Central journal article supplement — EMBO Rep. 2022 Jun 27;23(8):e54133. doi: 10.15252/embr.202154133 (PMC9346491; doi:10.15252/embr.202154133), 2022-06-27
Supplement: EMBR-23-e54133-s006.pdf [file EMBR-23-e54133-s006.pdf]

## Expanded View Figures

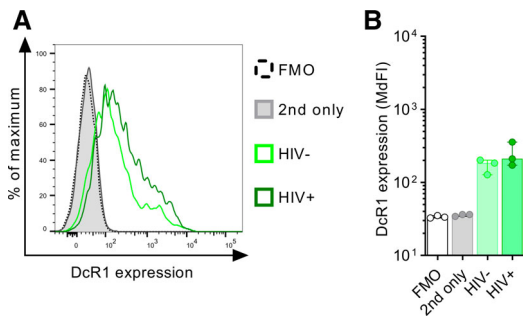

**Figure EV1. DcR1 is expressed on CD4 T cells.**

Primary enriched CD4 T cells were stimulated for 3 days and then infected with the HIV strain NL4-3. Four days post-infection cells were labeled with LIVE/DEAD Fixable Near-IR Stain, followed by incubation with  $\alpha$ CD4-APC,  $\alpha$ p24-FITC, goat anti-human DcR1, and then labeled with anti-goat-PE. Expression was measured as median fluorescence intensity (MdfI) by flow cytometry.

**A** Representative flow cytometry histogram of DcR1 expression on uninfected ( $\text{HIV}^-$ :  $\text{CD4}^+/\text{p24}^-$ ) and infected ( $\text{HIV}^+$ :  $\text{CD4}^+/\text{p24}^+$ ) cells in comparison to the anti-goat-PE control (grey) or FMO control (dashed line).

**B** Cumulative data of DcR1 expression displayed as MdfI. Data points represent the mean of two technical replicates per condition of three different donors ( $n = 3$ ). Bar graphs show the median. Error bars show the IQR.

Source data are available online for this figure.

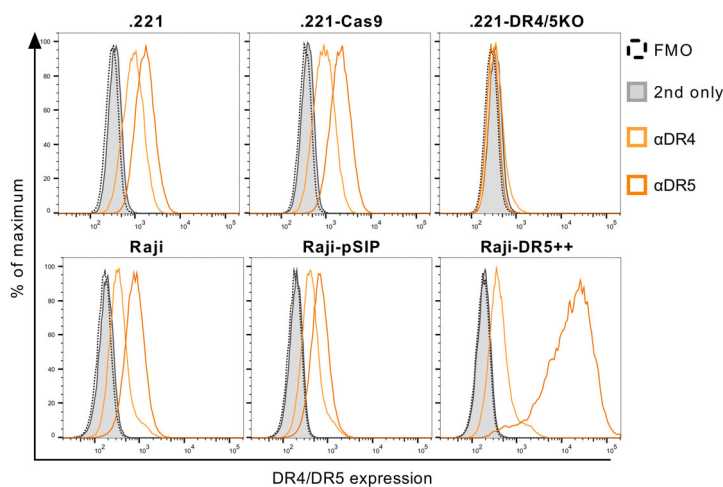

**Figure EV2. Expression of TRAIL receptors on transduced 721.221 and Raji cells.**

The expression of DR4 and DR5 was assessed by flow cytometry. 721.221 and Raji cells were labeled with LIVE/DEAD Fixable Near-IR Stain, followed by incubation with biotin-conjugated mouse anti-human DR4 or DR5, and then labeled with Streptavidin-BV421. Expression was quantified as fluorescence intensity. Representative histogram of DR4 (light orange) and DR5 (dark orange) expression in comparison to the Streptavidin-only control (grey) or the FMO control (dashed line). Upper panel (from left to right): untransduced 721.221 cells, Cas9-transduced .221s, and DR4/5 double knockout .221s. Lower panel (from left to right): untransduced Raji cells, Raji cells transduced with an empty vector (pSIP), and Raji cells overexpressing DR5.
